# Supplementary material for: Variation of refractive indices in self-assembling honeycomb patterned PMMA films
Source: Royal Society of Chemistry journal article supplement (doi:10.1039/d5lp00191a), 2025-10-23
Supplement: d5lp00191a2.zip [file Cauchy_Model_vs_Literature.xlsx]

## Sheet: Sheet2
			Experiment			Literature
			Wavelength (nm)	Refractive Index		Wavelength (nm)	Refractive Index
			553.9	1.49198		436	1.502
			560.7	1.49163		486.1	1.497
			567.5	1.4912		587.6	1.491
			574.3	1.49092		632.8	1.489
			581.1	1.4906		703	1.486
			587.8	1.49029		833	1.484
			594.6	1.48999		879	1.483
			601.4	1.48966		1052	1.481
			608.2	1.48938
			615	1.4891
			621.8	1.48881
			628.5	1.48855
			635.3	1.4883
			642.1	1.48803
			648.9	1.48779
			655.7	1.48753
			662.5	1.48731
			669.2	1.48709
			676	1.48686
			682.8	1.48665
			689.6	1.48643
			696.4	1.48624
			703.2	1.48603
			709.9	1.48584
			716.7	1.48566
			723.5	1.48547
			730.3	1.4853
			737.1	1.48512
			743.9	1.48494
			750.6	1.48478
			757.4	1.48461
			764.2	1.48446
			771	1.4843
			777.8	1.48416
			784.5	1.48401
			791.3	1.48387
			798.1	1.48373
			804.9	1.48359
			811.7	1.48346
			818.5	1.48333
			825.2	1.48321
			832	1.48308
			838.8	1.48295
			845.6	1.48283
