# Supplementary material for: Variation of refractive indices in self-assembling honeycomb patterned PMMA films
Source: Royal Society of Chemistry journal article supplement (doi:10.1039/d5lp00191a), 2025-10-23
Supplement: d5lp00191a2.zip [file Depth_height_analysis_of_PMMA_thin_films.xlsx]

## Sheet: Sheet1
	0.3			0.4			0.5			0.6
	Distance (um)	Thickness (um)		Distance (um)	Thickness (um)		Distance (um)	Thickness (um)		Distance (um)	Thickness (um)
	134.633	2.03714		80.091	0.579921		7.022	-0.501134		32.771	-0.0230278
	179.495	1.93872		97.939	0.528536		17.556	-0.479668		51.498	-0.00654629
	215.385	1.83611		124.712	0.447635		24.579	-0.465221		65.542	0.00645319
	242.302	1.74464		160.408	0.336794		29.846	-0.454301		84.27	0.0242174
	278.192	1.60582		169.333	0.309597		38.624	-0.435924		98.315	0.0379824
	305.109	1.49058		205.03	0.20873		42.135	-0.42851		117.041	0.0572699
	323.054	1.4102		258.575	0.0916512		45.646	-0.421059		135.767	0.0781587
	367.917	1.20309		285.348	0.0527883		47.402	-0.41732		140.449	0.083652
	385.862	1.11762		338.894	0.0277985		50.913	-0.409821		154.494	0.100541
	403.806	1.03159		374.59	0.0517361		56.18	-0.398521		173.221	0.12348
	430.724	0.90333		401.363	0.0859351		61.447	-0.387166		187.266	0.140824
	466.614	0.732241		428.135	0.128751		66.713	-0.375768		196.629	0.152422
	502.503	0.551526		481.681	0.230564		71.98	-0.364326		210.674	0.169886
	511.476	0.504021		472.757	0.21206		80.758	-0.345172		229.4	0.193542
	556.338	0.254169		508.453	0.290627		82.514	-0.341328		238.764	0.205599
	583.256	0.0957072		544.151	0.37914		89.537	-0.325917		248.127	0.217736
	610.173	-0.06606		561.998	0.426694		91.292	-0.322057		266.854	0.241761
	637.09	-0.226328		588.771	0.500868		98.315	-0.306586		276.217	0.253431
	655.035	-0.329142		615.544	0.57629		101.826	-0.29884		285.58	0.264637
	681.953	-0.472703		660.165	0.70103		105.337	-0.29109		304.307	0.284935
	735.787	-0.72212		678.014	0.751118		108.848	-0.283339		323.034	0.301833
	753.732	-0.796913		704.786	0.827122		112.36	-0.275588		341.76	0.315065
	798.595	-0.963796		731.559	0.903008		117.626	-0.263978		365.169	0.326624
	843.457	-1.09496		740.484	0.927399		119.382	-0.260111		388.576	0.332716
	915.237	-1.20787		776.18	1.01296		126.404	-0.244684		414.326	0.332221
	969.071	-1.19963		802.953	1.05959		129.916	-0.236997		436.563	0.325535
	1013.93	-1.12285		838.649	1.09447		136.938	-0.22171		455.291	0.31595
	1040.85	-1.04904		883.271	1.09092		138.694	-0.217908		470.506	0.306116
	1085.71	-0.893979		927.892	1.03983		143.961	-0.206567		484.551	0.295713
	1112.63	-0.789316		963.589	0.96873		150.983	-0.191618		497.425	0.285147
	1139.55	-0.681994		981.437	0.924743		152.739	-0.187916		509.129	0.274728
	1175.44	-0.537097		999.286	0.877051		158.006	-0.17691		520.833	0.263529
	1220.3	-0.349396		1026.06	0.801232		165.028	-0.162493		531.367	0.252745
	1247.22	-0.229612		1061.76	0.689282		170.295	-0.15189		540.73	0.242558
	1274.13	-0.10514		1079.6	0.625414		175.562	-0.141481		552.434	0.228963
	1310.03	0.067421		1097.45	0.555812		179.073	-0.134653		561.798	0.217319
	1327.97	0.156595		1115.3	0.480674		187.851	-0.117977		571.161	0.204943
	1354.89	0.293147		1133.15	0.39976		191.362	-0.111461		580.524	0.191811
	1381.81	0.433211		1159.92	0.266399		194.874	-0.105031		588.718	0.179719
	1408.72	0.577489		1177.77	0.168585		205.407	-0.0862469		598.08	0.165294
	1417.69	0.626243		1186.69	0.117323		210.674	-0.0771179		605.103	0.15413
	1444.61	0.771725		1213.47	-0.0416343		215.941	-0.0681548		610.955	0.144669
	1471.53	0.912088		1213.47	-0.0416343		221.208	-0.0593522		617.978	0.133197
	1480.5	0.957116		1231.32	-0.148341		226.475	-0.0507061		627.341	0.117772
	1525.36	1.16776		1249.16	-0.25252		229.986	-0.0450285		635.534	0.104165
	1561.25	1.32002		1267.01	-0.35266		233.497	-0.0394199		643.726	0.0904645
	1579.2	1.38903		1284.86	-0.448142		238.764	-0.0311374		651.92	0.0766693
	1615.09	1.50749		1302.71	-0.539436		247.542	-0.0176946		658.942	0.0647734
	1668.92	1.62968		1329.48	-0.671223		252.809	-0.0098546		667.135	0.050806
	1731.73	1.68775		1347.33	-0.757285		258.076	-0.00219468		675.327	0.0367346
	1785.57	1.65179		1356.25	-0.799842		266.854	0.0101393		682.058	0.0250778
	1821.45	1.58559		1383.03	-0.924431		273.876	0.0195841		687.324	0.0158913
	1857.35	1.49532		1391.95	-0.964667		280.899	0.028619		693.469	0.0051008
	1920.15	1.29978		1409.8	-1.04223		286.166	0.0351042		701.369	-0.00886112
	1947.07	1.20117		1427.65	-1.11478		291.433	0.041323		707.514	-0.0197632
	2000.9	0.977133		1463.35	-1.24311		300.211	0.051052		712.781	-0.0291047
	2027.82	0.85166		1472.27	-1.2717		308.989	0.059923		719.803	-0.0414965
	2081.66	0.571877		1499.04	-1.34728		317.767	0.0678642		726.826	-0.053749
	2108.57	0.413247		1525.82	-1.40627		326.545	0.0748059		734.726	-0.0672542
	2135.49	0.241368		1561.51	-1.45853		337.079	0.0817239		740.871	-0.0774723
	2162.41	0.0571688		1597.21	-1.4788		345.857	0.0862396		747.015	-0.087367
	2189.33	-0.13762		1641.83	-1.45673		356.39	0.0900686		754.038	-0.098213
	2216.24	-0.338432		1659.68	-1.43417		366.924	0.0920679		761.06	-0.108501
	2225.22	-0.405867		1686.45	-1.38928		377.458	0.0921545		768.083	-0.11819
	2234.19	-0.472966		1704.3	-1.35366		386.236	0.0907289		779.494	-0.132593
	2270.08	-0.732607		1731.07	-1.29258		396.77	0.0872145		794.417	-0.148959
	2297	-0.916345		1748.92	-1.24598		400.281	0.0856116		807.584	-0.16118
	2323.91	-1.08977		1775.69	-1.16621		410.815	0.0795586		820.751	-0.171377
	2341.86	-1.19821		1793.54	-1.10538		417.837	0.0745423		832.163	-0.178546
	2350.83	-1.24947		1811.39	-1.03769		426.615	0.0672535		847.086	-0.185391
	2413.64	-1.54628		1829.24	-0.962953		431.882	0.0623772		865.52	-0.189553
	2458.5	-1.70483		1847.09	-0.881038		442.416	0.0516052		883.954	-0.188707
	2512.34	-1.84235		1864.94	-0.792366		445.927	0.0477392		896.243	-0.185386
	2575.14	-1.91888		1864.94	-0.792366		452.949	0.0396388		908.532	-0.17992
	2602.06	-1.92162		1891.71	-0.650383		458.216	0.0332687		919.944	-0.17295
	2637.95	-1.898		1900.63	-0.601875		463.483	0.0266697		931.355	-0.164142
	2673.84	-1.84649		1909.56	-0.553467		470.506	0.0175407		942.767	-0.153432
	2718.7	-1.74872		1918.48	-0.505692		477.528	0.00805728		950.959	-0.144514
	2754.59	-1.64994		1945.25	-0.368159		488.062	-0.00681867		959.738	-0.133774
	2781.51	-1.56865		1945.25	-0.368159		493.329	-0.0145527		965.004	-0.126734
	2826.37	-1.41788		1972.03	-0.237109		500.351	-0.0251784		970.271	-0.119251
	2871.23	-1.23734		1989.87	-0.150128		505.618	-0.0333907		975.538	-0.111345
	2889.18	-1.15375		2007.72	-0.0610534		517.907	-0.0534021		980.805	-0.103033
	2907.12	-1.0643		2025.57	0.031214		524.93	-0.06541		986.072	-0.0943341
	2925.07	-0.971279		2043.42	0.125726		530.197	-0.0747016		993.094	-0.0821774
	2934.04	-0.924347		2052.34	0.172906		533.708	-0.0810329		996.606	-0.0758771
	2969.93	-0.737477		2079.12	0.309693		538.975	-0.090737		1005.38	-0.0595614
	2987.88	-0.644405		2096.97	0.39517		542.486	-0.0973433		1007.14	-0.0562094
	3005.82	-0.551471		2123.74	0.513839		549.508	-0.110887		1015.92	-0.0390158
	3032.74	-0.410571		2132.66	0.551088		554.775	-0.121337		1021.18	-0.0283469
	3041.71	-0.362589		2150.51	0.62183		560.042	-0.132043		1026.45	-0.0174006
	3068.63	-0.213761		2177.28	0.718611		565.309	-0.143008		1033.47	-0.00235196
	3095.55	-0.0557104		2212.98	0.836197		570.576	-0.154235		1038.74	0.00930504
	3095.55	-0.0557104		2239.75	0.921252		575.843	-0.165723		1044.01	0.0212937
	3095.55	-0.0557104		2266.53	1.00467		581.11	-0.177472		1047.52	0.0294687
	3131.43	0.166097		2284.37	1.05912		584.621	-0.185446		1054.54	0.0462281
	3149.38	0.27686		2320.07	1.16198		589.888	-0.197617		1056.3	0.050496
	3185.27	0.491914		2337.92	1.20889		595.154	-0.210033		1061.56	0.0634478
	3194.24	0.544152		2382.54	1.30489		598.666	-0.218448		1065.08	0.0721869
	3203.21	0.595489		2418.24	1.35731		602.177	-0.226966		1068.59	0.0809783
	3239.1	0.787328		2453.93	1.38666		607.444	-0.23994		1072.1	0.0898021
	3257.05	0.873546		2507.48	1.38096		610.955	-0.248717		1077.36	0.10306
	3283.97	0.988238		2561.02	1.32129		614.466	-0.257594		1079.12	0.107478
	3328.83	1.14131		2596.72	1.24889		617.978	-0.266574		1081.75	0.114095
	3355.75	1.21467		2623.49	1.17833		623.244	-0.280223		1084.39	0.120699
	3400.61	1.31155		2632.42	1.15243		625	-0.284823		1087.9	0.129489
	3454.44	1.37918		2659.19	1.07084		630.267	-0.298766		1091.41	0.138258
	3517.25	1.3568		2685.96	0.986305		637.289	-0.317687		1094.04	0.144827
	3580.06	1.20835		2703.81	0.928482		637.289	-0.317687		1097.55	0.153584
	3615.95	1.06976		2730.59	0.840238		642.556	-0.332122		1100.19	0.16015
	3624.92	1.02988		2748.43	0.780752		646.067	-0.341854		1101.94	0.164531
	3642.86	0.945207		2766.28	0.721168		651.334	-0.356612		1104.58	0.171103
	3669.78	0.80946		2793.05	0.632068		653.09	-0.361572		1107.21	0.177679
	3705.67	0.617631		2801.98	0.602374		661.868	-0.386653		1111.89	0.189381
	3723.62	0.517613		2828.75	0.513118		661.868	-0.386653		1115.4	0.198166
	3768.48	0.253553		2864.45	0.389857		672.402	-0.417326		1117.74	0.204026
	3777.45	0.197127		2873.37	0.357604		674.157	-0.42249		1120.08	0.209885
	3804.37	0.0196379		2891.22	0.291592		681.18	-0.443283		1124.77	0.221593
	3840.26	-0.237749		2917.99	0.189842		684.691	-0.453742		1127.11	0.227437
	3858.2	-0.376426		2926.92	0.155305		691.713	-0.474745		1130.62	0.236186
	3876.15	-0.521883		2935.84	0.120755		698.736	-0.495814		1134.13	0.244912
	3885.12	-0.596718		2962.61	0.0203661		702.247	-0.506349		1138.81	0.256517
	3912.04	-0.823821		2989.39	-0.0702743		707.514	-0.522127		1142.32	0.2652
	3912.04	-0.823821		3025.08	-0.173279		712.781	-0.537839		1147	0.276757
	3938.96	-1.04293		3051.86	-0.238995		716.292	-0.548254		1149.34	0.28253
	3965.87	-1.24389		3096.48	-0.331876		721.559	-0.56376		1154.03	0.29407
	3983.82	-1.36523		3114.33	-0.364467		725.07	-0.573998		1158.71	0.305614
	4028.68	-1.62571		3150.02	-0.41819		730.337	-0.589182		1164.56	0.320076
	4046.63	-1.71666		3176.8	-0.443038		737.36	-0.609057		1166.9	0.325882
	4091.49	-1.91462		3239.26	-0.433502		740.871	-0.61882		1170.41	0.334615
	4118.41	-2.01508		3283.89	-0.375651		744.382	-0.628462		1175.09	0.346301
	4136.35	-2.07363		3301.74	-0.343465		753.16	-0.652021		1176.26	0.349233
	4199.16	-2.2105		3328.51	-0.287937		756.671	-0.661221		1180.94	0.360987
	4244.02	-2.24059		3364.2	-0.19843		761.938	-0.674782		1184.46	0.369837
	4306.83	-2.19166		3382.05	-0.145835		765.449	-0.683657		1187.97	0.37871
	4351.69	-2.09522		3390.98	-0.117811		767.205	-0.688047		1190.31	0.384636
	4414.5	-1.88897		3408.83	-0.0594216		772.472	-0.701011		1194.99	0.3965
	4459.36	-1.69855		3426.67	0.000832995		779.494	-0.71782		1199.67	0.408368
	4495.25	-1.51751		3444.52	0.0620083		781.25	-0.721937		1202.01	0.414294
	4522.17	-1.36193		3471.3	0.15616		790.028	-0.741999		1206.69	0.426111
	4531.14	-1.30644		3489.14	0.222781		791.784	-0.745908		1210.2	0.434923
	4567.03	-1.06702		3515.92	0.330585		798.806	-0.761187		1213.72	0.443672
	4593.95	-0.867394		3515.92	0.330585		800.562	-0.764919		1217.23	0.452332
	4611.89	-0.726174		3524.84	0.368643		805.829	-0.775897		1219.57	0.458045
	4629.84	-0.581864		3542.69	0.446569		812.851	-0.790022		1224.25	0.469293
	4638.81	-0.510046		3551.61	0.485875		818.118	-0.800233		1227.76	0.477554
	4665.73	-0.301706		3560.54	0.524929		823.385	-0.810116		1231.27	0.485636
	4719.56	0.0788605		3569.46	0.563369		832.163	-0.825867		1235.95	0.496111
	4728.53	0.139522		3596.23	0.674936		840.941	-0.840733		1240.64	0.506207
	4755.45	0.317711		3596.23	0.674936		849.719	-0.85472		1244.15	0.513519
	4773.4	0.432493		3623.01	0.784891		860.253	-0.870332		1248.83	0.522896
	4809.28	0.651306		3631.93	0.822264		863.764	-0.875244		1251.17	0.527423
	4845.18	0.864258		3649.78	0.898512		872.542	-0.88686		1257.02	0.538251
	4872.09	1.02757		3649.78	0.898512		876.053	-0.891227		1260.53	0.544413
	4890.04	1.13978		3667.63	0.97573		884.831	-0.901403		1265.21	0.552231
	4925.93	1.36942		3676.55	1.01418		890.098	-0.906973		1271.07	0.561375
	4943.87	1.48563		3703.32	1.12624		898.876	-0.915305		1278.09	0.571443
	4970.79	1.65944		3712.25	1.16199		909.41	-0.923638		1283.94	0.579097
				3756.87	1.31764		919.944	-0.930037		1288.62	0.584759
				3730.1	1.22943		926.966	-0.933175		1295.65	0.592493
				3783.64	1.39182		948.034	-0.93699		1301.5	0.598267
				3721.17	1.19651		962.079	-0.934851		1308.52	0.604427
				3810.42	1.45483		974.368	-0.930028		1319.05	0.61221
				3855.04	1.54097		981.39	-0.926112		1327.25	0.617161
				3872.89	1.57014		988.413	-0.921407		1335.44	0.621212
				3917.51	1.62473		1000.7	-0.911442		1344.8	0.624766
				3953.2	1.64471		1004.21	-0.908223		1356.51	0.62758
				4015.67	1.61395		1014.75	-0.897665		1367.04	0.628482
				4051.37	1.55614		1023.52	-0.887922		1377.58	0.627687
				4069.22	1.51802		1030.55	-0.879568		1387.23	0.625347
				4095.99	1.45384		1035.82	-0.873003		1396.01	0.621839
				4122.76	1.38556		1044.59	-0.861522		1403.03	0.618097
				4140.61	1.3392		1049.86	-0.854323		1409.18	0.614166
				4158.46	1.29247		1055.13	-0.846901		1415.32	0.609655
				4185.23	1.22064		1060.39	-0.839263		1421.46	0.604598
				4203.08	1.16985		1067.42	-0.828758		1427.61	0.599031
				4229.85	1.08597		1074.44	-0.817899		1432.88	0.593875
				4247.7	1.02288		1079.7	-0.809523		1439.02	0.587431
				4265.55	0.953404		1086.73	-0.798046		1443.41	0.582551
				4274.48	0.916631		1093.75	-0.786206		1446.04	0.579515
				4292.32	0.840507		1093.75	-0.786206		1449.56	0.575349
				4328.02	0.683538		1102.53	-0.770861		1453.65	0.570319
				4328.02	0.683538		1107.8	-0.761343		1458.33	0.564354
				4345.87	0.604969		1118.33	-0.741536		1465.36	0.554965
				4354.79	0.566663		1125.35	-0.727705		1472.38	0.545031
				4372.64	0.493733		1132.37	-0.713317		1480.57	0.532711
				4408.34	0.363036		1137.64	-0.702143		1485.25	0.525302
				4444.03	0.24528		1142.91	-0.690624		1492.28	0.513678
				4435.11	0.27384		1148.17	-0.678759		1498.13	0.503525
				4470.81	0.160834		1148.17	-0.678759		1502.81	0.495107
				4497.58	0.0788226		1155.2	-0.662403		1509.83	0.482018
				4524.35	0.00136761		1160.46	-0.649748		1514.51	0.472996
				4551.13	-0.0698638		1167.49	-0.632369		1519.19	0.463757
				4613.6	-0.19931		1171	-0.623475		1522.7	0.456696
				4658.22	-0.255575		1172.75	-0.618978		1528.56	0.44469
				4702.84	-0.27241		1176.26	-0.609891		1532.07	0.437351
				4729.61	-0.256337		1183.29	-0.59136		1539.09	0.422361
				4774.23	-0.188515		1186.8	-0.581931		1542.6	0.414697
				4809.93	-0.106025		1192.07	-0.567596		1546.11	0.406919
				4836.7	-0.0328247		1195.58	-0.557919		1551.97	0.39368
				4836.7	-0.0328247		1197.33	-0.553048		1553.14	0.39099
				4872.4	0.06908		1202.6	-0.538293		1557.82	0.380067
				4890.25	0.119176		1206.11	-0.528346		1561.33	0.3717
				4925.94	0.214256		1213.13	-0.5082		1566.01	0.360276
				4934.87	0.236987		1218.4	-0.492869		1569.52	0.351486
				4961.64	0.302136		1221.91	-0.482549		1575.37	0.33635
				4997.34	0.383513		1223.67	-0.47736		1577.71	0.330106
							1228.93	-0.461694		1583.57	0.313983
							1232.44	-0.451181		1587.08	0.303934
							1234.2	-0.445908		1592.93	0.286551
							1237.71	-0.43533		1597.61	0.272067
							1239.47	-0.430034		1601.12	0.260882
							1244.73	-0.414122		1604.63	0.24945
							1246.49	-0.408816		1609.32	0.23388
							1250	-0.398215		1612.83	0.222012
							1250	-0.398215		1615.17	0.214031
							1255.27	-0.382354		1619.85	0.197999
							1257.02	-0.377085		1624.53	0.181955
							1264.05	-0.356097		1629.21	0.166001
							1264.05	-0.356097		1633.89	0.150225
							1269.31	-0.340474		1638.58	0.134695
							1272.82	-0.33012		1640.92	0.127038
							1274.58	-0.324961		1645.6	0.111983
							1278.09	-0.314686		1646.77	0.108278
							1278.09	-0.314686		1652.62	0.0901465
							1279.85	-0.309568		1659.64	0.0692369
							1286.87	-0.28923		1666.67	0.0492083
							1292.13	-0.274093		1672.52	0.0331142
							1297.4	-0.259031		1680.71	0.011346
							1300.91	-0.249022		1684.22	0.00224656
							1307.93	-0.229055		1688.9	-0.00969022
							1314.96	-0.209115		1697.1	-0.0300233
							1320.22	-0.194164		1702.95	-0.0441111
							1321.98	-0.189182		1709.97	-0.0605366
							1323.74	-0.184198		1718.16	-0.0790325
							1327.25	-0.17424		1724.02	-0.0918032
							1329	-0.169266		1728.7	-0.101748
							1336.03	-0.149447		1738.06	-0.120918
							1339.54	-0.139592		1749.77	-0.143644
							1346.56	-0.120043		1761.47	-0.165198
							1351.83	-0.10554		1766.15	-0.173531
							1353.58	-0.100743		1775.51	-0.18966
							1357.09	-0.0911997		1783.71	-0.203149
							1362.36	-0.0770465		1793.07	-0.217768
							1364.12	-0.0723762		1798.92	-0.226434
							1369.38	-0.0585091		1811.8	-0.244118
							1376.4	-0.0403973		1816.48	-0.250065
							1378.16	-0.0359401		1825.84	-0.261149
							1379.92	-0.0315131		1836.38	-0.272254
							1388.69	-0.00985456		1849.25	-0.283808
							1393.96	0.0027508		1856.27	-0.289162
							1399.23	0.0150525		1865.64	-0.295208
							1406.25	0.0309702		1877.34	-0.300872
							1411.52	0.0425413		1889.05	-0.304259
							1418.54	0.0574725		1900.75	-0.305202
							1427.32	0.075345		1914.79	-0.302951
							1434.34	0.0890147		1920.65	-0.300923
							1441.36	0.102119		1927.67	-0.297682
							1448.38	0.114648		1933.52	-0.294356
							1464.18	0.140644		1939.37	-0.29052
							1472.96	0.15372		1945.22	-0.286236
							1485.25	0.170312		1953.42	-0.279591
							1501.05	0.188578		1959.27	-0.274439
							1509.83	0.197161		1967.46	-0.266752
							1523.88	0.208436		1974.48	-0.259787
							1536.17	0.215689		1980.34	-0.253759
							1550.21	0.220828		1988.53	-0.245025
							1562.5	0.222456		1996.72	-0.235987
							1585.32	0.218341		2002.58	-0.229363
							1595.86	0.213421		2009.6	-0.22124
							1609.9	0.204134		2016.62	-0.212901
							1623.95	0.192044		2025.98	-0.201369
							1630.97	0.185059		2031.84	-0.193867
							1637.99	0.17751		2037.69	-0.186107
							1646.77	0.167361		2043.54	-0.178072
							1657.3	0.154255		2049.39	-0.169743
							1664.33	0.145025		2055.24	-0.16109
							1674.86	0.130538		2062.27	-0.150214
							1683.64	0.117935		2069.29	-0.138707
							1688.9	0.11016		2075.14	-0.128552
							1699.44	0.0941448		2080.99	-0.117832
							1708.22	0.0803287		2083.33	-0.11338
							1716.99	0.0660799		2086.84	-0.106532
							1725.77	0.0513892		2090.36	-0.0994861
							1732.8	0.0393188		2095.04	-0.0898256
							1741.57	0.0238572		2097.38	-0.0848942
							1745.08	0.0175656		2104.4	-0.0698007
							1753.86	0.00160001		2109.08	-0.0595683
							1759.13	-0.00812234		2113.76	-0.0492764
							1766.15	-0.021225		2120.79	-0.0338425
							1773.17	-0.034457		2131.32	-0.0109405
							1774.93	-0.0377829		2134.83	-0.00340858
							1785.46	-0.0578429		2141.85	0.0114435
							1790.73	-0.0679331		2152.39	0.0330633
							1797.75	-0.0814389		2155.9	0.040067
							1806.53	-0.0984094		2166.43	0.0604068
							1815.31	-0.115503		2166.43	0.0604068
							1822.33	-0.129279		2183.99	0.0924221
							1827.6	-0.139672		2191.01	0.104912
							1834.62	-0.153598		2198.03	0.117331
							1839.89	-0.164082		2212.08	0.141831
							1846.91	-0.178091		2219.1	0.153826
							1853.93	-0.192116		2226.12	0.165519
							1862.71	-0.209616		2236.66	0.182144
							1869.73	-0.223545		2243.68	0.192435
							1875	-0.233923		2257.72	0.210766
							1882.02	-0.247627		2271.77	0.226006
							1889.05	-0.261143		2285.82	0.238145
							1897.82	-0.277718		2296.35	0.245178
							1904.85	-0.290686		2310.39	0.251689
							1913.62	-0.306467		2324.44	0.254862
							1917.13	-0.312629		2341.99	0.25429
							1924.16	-0.324666		2359.55	0.249085
							1945.22	-0.358221		2370.08	0.244018
							1957.51	-0.375861		2384.13	0.235362
							1966.29	-0.387517		2394.66	0.227686
							1976.83	-0.400391		2398.17	0.224937
							1996.14	-0.42053		2415.73	0.209702
							2008.43	-0.43079		2429.78	0.195165
							2034.76	-0.445225		2440.31	0.182496
							2052.32	-0.448515		2447.33	0.173076
							2071.63	-0.445829		2457.86	0.157395
							2085.67	-0.439645		2461.38	0.151749
							2103.23	-0.427043		2471.91	0.133671
							2119.03	-0.411366		2478.93	0.120815
							2126.05	-0.403176		2482.44	0.114191
							2138.34	-0.387155		2489.47	0.100628
							2155.9	-0.360791		2496.49	0.0867332
							2162.92	-0.349158		2507.02	0.0653652
							2171.7	-0.333792		2514.05	0.050722
							2183.99	-0.310847		2524.58	0.0280517
							2187.5	-0.304008		2528.09	0.0202826
							2196.28	-0.286415		2535.11	0.00440018
							2203.3	-0.271886		2542.14	-0.0119796
							2208.57	-0.260765		2552.67	-0.0375767
							2219.1	-0.238029		2556.18	-0.0463999
							2226.12	-0.222553		2570.22	-0.0829653
							2234.9	-0.202889		2570.22	-0.0829653
							2240.17	-0.190922		2573.74	-0.0923521
							2247.19	-0.174762		2584.27	-0.120629
							2255.97	-0.154194		2591.29	-0.13925
							2261.24	-0.141635		2598.32	-0.15746
							2268.26	-0.124611		2601.83	-0.166364
							2273.53	-0.111616		2619.38	-0.208907
							2278.79	-0.0984151		2622.89	-0.217095
							2285.82	-0.0804775		2636.94	-0.248873
							2292.84	-0.0621347		2647.47	-0.27155
							2301.61	-0.038591		2647.47	-0.27155
							2310.39	-0.0143172		2661.52	-0.299773
							2315.66	0.000613051		2668.54	-0.312818
							2319.17	0.0107172		2675.56	-0.32507
							2326.19	0.0312769		2693.12	-0.35236
							2331.46	0.0469817		2707.16	-0.37145
							2336.73	0.0629081		2717.7	-0.384632
							2341.99	0.0790282		2735.25	-0.404998
							2347.26	0.0953202		2752.81	-0.423698
							2350.77	0.106259		2773.88	-0.443933
							2357.8	0.12828		2787.92	-0.455636
							2361.31	0.139337		2816.01	-0.472147
							2363.06	0.144873		2837.08	-0.47633
							2368.33	0.161487		2854.64	-0.472959
							2375.35	0.183601		2872.19	-0.462921
							2382.37	0.205614		2889.75	-0.446775
							2389.4	0.227462		2896.77	-0.438851
							2392.91	0.238311		2910.82	-0.421013
							2401.68	0.265166		2914.33	-0.416208
							2406.95	0.281068		2928.37	-0.39587
							2412.22	0.296785		2942.42	-0.373886
							2417.49	0.312286		2949.44	-0.362254
							2419.24	0.317401		2959.97	-0.343985
							2424.51	0.332563		2970.51	-0.324717
							2429.78	0.347438		2981.04	-0.304516
							2433.29	0.357182		2988.06	-0.290587
							2435.04	0.361995		2995.08	-0.276361
							2438.55	0.371511		3005.62	-0.254606
							2440.31	0.376212		3012.64	-0.239899
							2445.58	0.39007		3019.66	-0.225081
							2449.09	0.399105		3030.2	-0.202707
							2454.35	0.412352		3033.71	-0.195214
							2459.62	0.425235		3044.24	-0.17267
							2464.89	0.437758		3051.26	-0.15761
							2471.91	0.45391		3054.78	-0.150074
							2471.91	0.45391		3065.31	-0.127463
							2482.44	0.477023		3072.33	-0.112399
							2485.95	0.484443		3075.84	-0.10488
							2492.98	0.498881		3086.38	-0.0824483
							2496.49	0.505904		3093.4	-0.0676162
							2501.76	0.516204		3103.93	-0.0456608
							2510.53	0.532768		3114.47	-0.0242111
							2515.8	0.542356		3117.98	-0.0172118
							2517.56	0.545494		3121.49	-0.0103192
							2526.33	0.560748		3128.51	0.00304811
							2531.6	0.569537		3135.53	0.0157
							2538.62	0.580809		3149.58	0.0383162
							2543.89	0.58891		3160.11	0.0526818
							2549.16	0.596703		3174.16	0.0682895
							2557.93	0.608977		3184.69	0.0775081
							2566.71	0.620333		3205.76	0.0900393
							2577.25	0.632699		3216.29	0.0934681
							2586.03	0.641917		3233.85	0.0948767
							2598.32	0.653099		3247.89	0.0920701
							2607.09	0.659802		3261.94	0.0859278
							2619.38	0.667288		3272.47	0.0794335
							2633.43	0.672979		3290.03	0.0658016
							2645.72	0.675323		3300.56	0.056255
							2665.03	0.673887		3318.12	0.0384055
							2675.56	0.670493		3325.14	0.0305483
							2686.1	0.665348		3335.67	0.0179892
							2689.61	0.663268		3346.21	0.00451232
							2700.14	0.656017		3363.76	-0.019921
							2709.5	0.648402		3374.3	-0.035718
							2720.04	0.638661		3381.32	-0.0466659
							2730.57	0.627799		3388.34	-0.0579078
							2737.01	0.620658		3395.36	-0.0694022
							2746.96	0.608933		3402.39	-0.0811166
							2753.98	0.600183		3409.41	-0.0929942
							2759.83	0.592612		3419.94	-0.111026
							2765.68	0.584792		3426.97	-0.123203
							2773.88	0.57344		3441.01	-0.148069
							2775.05	0.571779		3444.52	-0.154425
							2784.41	0.558151		3448.03	-0.160843
							2786.75	0.554645		3458.57	-0.180438
							2794.94	0.542055		3469.1	-0.200638
							2801.97	0.530849		3472.61	-0.207517
							2806.65	0.52315		3486.66	-0.235637
							2810.16	0.517252		3490.17	-0.242781
							2814.84	0.509216		3497.19	-0.257119
							2818.35	0.503057		3507.72	-0.278601
							2821.86	0.496783		3514.75	-0.292812
							2825.37	0.490392		3521.77	-0.306837
							2828.89	0.483881		3528.79	-0.320577
							2832.4	0.477253		3539.33	-0.34051
							2838.25	0.465939		3546.35	-0.353303
							2841.76	0.45899		3560.39	-0.377547
							2846.44	0.449536		3563.9	-0.383304
							2849.95	0.442309		3570.93	-0.39439
							2852.29	0.437425		3584.97	-0.414497
							2858.15	0.425004		3599.02	-0.431523
							2859.32	0.422483		3606.04	-0.438827
							2865.17	0.409724		3627.11	-0.455892
							2869.85	0.399336		3641.15	-0.463452
							2874.53	0.388802		3665.73	-0.469661
							2876.87	0.383486		3690.31	-0.467226
							2882.72	0.370072		3711.38	-0.458193
							2885.07	0.364666		3721.91	-0.451272
							2888.58	0.356513		3742.98	-0.432568
							2892.09	0.348323		3757.02	-0.416364
							2896.77	0.337357		3771.07	-0.397066
							2899.11	0.331862		3774.58	-0.391746
							2903.79	0.320848		3785.11	-0.374626
							2910.82	0.304297		3792.14	-0.362271
							2916.67	0.290491		3802.67	-0.342406
							2922.52	0.276681		3806.18	-0.335444
							2926.03	0.268393		3816.71	-0.313638
							2930.71	0.257343		3823.74	-0.298407
							2935.39	0.246289		3827.25	-0.290605
							2940.07	0.235236		3834.27	-0.274663
							2943.59	0.226946		3841.29	-0.258329
							2948.27	0.215892		3848.32	-0.241655
							2951.78	0.207603		3858.85	-0.21604
							2955.29	0.199312		3869.38	-0.189618
							2958.8	0.19102		3872.89	-0.180624
							2962.31	0.182722		3879.92	-0.162383
							2965.82	0.174421		3879.92	-0.162383
							2970.51	0.163337		3886.94	-0.143916
							2971.68	0.160564		3890.45	-0.134649
							2977.53	0.146669		3897.47	-0.116162
							2977.53	0.146669		3908.01	-0.0887409
							2979.87	0.141096		3911.52	-0.0797059
							2984.55	0.129921		3918.54	-0.0618086
							2989.23	0.118699		3925.56	-0.0441315
							2992.74	0.110244		3932.58	-0.0266762
							2998.6	0.096074		3939.61	-0.0094325
							2999.77	0.0932283		3953.65	0.0245364
							3003.28	0.0846622		3953.65	0.0245364
							3004.45	0.0817988		3960.67	0.0413457
							3009.13	0.0702956		3964.18	0.0496867
							3011.47	0.064517		3971.21	0.0661597
							3014.98	0.0558162		3981.74	0.0901343
							3022	0.0382866		3992.28	0.113139
							3023.17	0.0353497		4006.32	0.142568
							3027.86	0.0235499		4013.34	0.156937
							3029.03	0.02059		4016.85	0.164048
							3032.54	0.0116823		4023.88	0.178085
							3036.05	0.00273698		4030.9	0.191793
							3040.73	-0.00923321		4041.43	0.211586
							3044.24	-0.0182434		4051.97	0.23039
							3047.75	-0.0272696		4069.52	0.259479
							3053.61	-0.0423357		4080.06	0.275629
							3054.78	-0.0453483		4090.59	0.290733
							3060.63	-0.060397		4101.12	0.304614
							3061.8	-0.0634013		4111.66	0.317022
							3066.48	-0.0753747		4129.21	0.333945
							3072.33	-0.0902149		4157.3	0.350243
							3074.67	-0.0961021		4171.35	0.353189
							3078.18	-0.104866		4185.39	0.352631
							3084.04	-0.119266		4202.95	0.3473
							3086.38	-0.124938		4224.02	0.335326
							3091.06	-0.136124		4245.08	0.318901
							3100.42	-0.157757		4255.62	0.309594
							3105.1	-0.168171		4276.69	0.289753
							3113.3	-0.185693		4294.24	0.272235
							3120.32	-0.199969		4308.29	0.257444
							3129.68	-0.217895		4329.35	0.23371
							3142.56	-0.240402		4339.89	0.221108
							3147.24	-0.247958		4353.93	0.203708
							3160.11	-0.266962		4371.49	0.18149
							3172.99	-0.283347		4385.53	0.163693
							3182.35	-0.293604		4406.6	0.137621
							3194.05	-0.304428		4441.71	0.0956763
							3205.76	-0.312982		4448.74	0.0872701
							3220.97	-0.320652		4459.27	0.074636
							3242.04	-0.324883		4478	0.0527341
							3261.94	-0.322341		4496.72	0.0328877
							3274.81	-0.317534		4516.62	0.0151349
							3283.01	-0.313288		4555.24	-0.00960065
							3291.2	-0.308202		4573.97	-0.0182294
							3298.22	-0.30323		4611.42	-0.0317017
							3306.41	-0.296778		4648.88	-0.0438232
							3319.29	-0.285366		4676.97	-0.0526392
							3326.31	-0.278543		4711.2	-0.0633137
							3335.67	-0.268832		4742.51	-0.0719353
							3346.21	-0.257088		4765.62	-0.0774788
							3354.4	-0.247351		4789.33	-0.0827902
							3366.11	-0.232498		4809.52	-0.0871993
							3373.13	-0.223037		4835.85	-0.0927512
							3378.98	-0.214831		4862.18	-0.0979048
							3384.83	-0.206338		4889.4	-0.10271
							3391.85	-0.195766		4913.1	-0.106456
							3395.36	-0.190328		4935.92	-0.10979
							3400.05	-0.182924
							3404.73	-0.17535
							3410.58	-0.165642
							3415.26	-0.15769
							3422.28	-0.145445
							3426.97	-0.137073
							3430.48	-0.130681
							3433.99	-0.124194
							3443.35	-0.106414
							3448.03	-0.0972483
							3456.23	-0.0807513
							3458.57	-0.0759301
							3464.42	-0.0636583
							3469.1	-0.0536194
							3474.95	-0.0407998
							3477.29	-0.0355886
							3483.15	-0.0223628
							3487.83	-0.0115874
							3494.85	0.00486761
							3498.36	0.0132175
							3500.7	0.018821
							3504.21	0.0272831
							3511.24	0.0443775
							3514.75	0.0529917
							3517.09	0.0587546
							3521.77	0.070315
							3526.45	0.0819018
							3533.47	0.0992984
							3535.82	0.105092
							3542.84	0.122426
							3542.84	0.122426
							3551.03	0.142515
							3556.88	0.156741
							3559.22	0.162397
							3565.07	0.176434
							3568.59	0.184778
							3573.27	0.195806
							3577.95	0.206708
							3584.97	0.222814
							3589.65	0.233369
							3594.34	0.243774
							3599.02	0.254014
							3603.7	0.264077
							3608.38	0.273953
							3611.89	0.281229
							3616.57	0.290744
							3622.43	0.30232
							3628.86	0.314621
							3634.13	0.324337
							3641.15	0.3368
							3651.68	0.354469
							3662.22	0.371003
							3678.02	0.393931
							3695.58	0.417255
							3702.6	0.426072
							3714.89	0.440889
							3734.2	0.462641
							3739.47	0.468243
							3750	0.478975
							3765.8	0.493702
							3778.09	0.503809
							3788.62	0.511386
							3807.93	0.522296
							3825.49	0.528524
							3841.29	0.53091
							3865.87	0.52847
							3888.69	0.519797
							3902.74	0.511695
							3911.52	0.505692
							3923.81	0.496237
							3936.1	0.485747
							3941.36	0.480987
							3951.9	0.471074
							3960.67	0.462486
							3971.21	0.451877
							3981.74	0.441007
							3992.28	0.429921
							4004.57	0.416756
							4015.1	0.405304
							4030.9	0.387841
							4034.41	0.383915
							4051.97	0.364043
							4062.5	0.351942
							4074.79	0.337697
							4085.32	0.325422
							4095.86	0.313124
							4108.15	0.29877
							4118.68	0.286474
							4132.73	0.270102
							4148.52	0.251717
							4155.55	0.243564
							4169.59	0.227347
							4185.39	0.209365
							4195.93	0.197611
							4208.22	0.184232
							4225.77	0.165965
							4239.82	0.152257
							4252.11	0.141056
							4271.42	0.125181
							4297.75	0.107343
							4317.06	0.0973204
							4346.91	0.0876275
							4378.51	0.0863875
							4401.33	0.0919659
							4424.16	0.103112
							4434.69	0.110043
							4448.74	0.120822
							4457.51	0.128318
							4476.83	0.146446
							4485.6	0.155301
							4501.4	0.172035
							4511.94	0.183703
							4525.98	0.199848
							4529.49	0.203986
							4547.05	0.225277
							4557.58	0.238538
							4566.36	0.24987
							4576.9	0.263778
							4587.43	0.277979
							4597.96	0.292414
							4604.99	0.302138
							4615.52	0.316823
							4622.54	0.326653
							4636.59	0.346342
							4647.12	0.361087
							4655.9	0.373329
							4669.94	0.392796
							4676.97	0.402466
							4691.01	0.421649
							4703.3	0.438216
							4708.57	0.445235
							4720.86	0.461371
							4731.39	0.474867
							4743.68	0.490135
							4755.97	0.504781
							4770.01	0.52063
							4780.55	0.531841
							4785.81	0.537218
							4805.13	0.555574
							4820.93	0.568951
							4836.73	0.580802
							4841.99	0.584411
							4857.8	0.59423
							4878.86	0.605084
							4898.17	0.613034
							4915.73	0.618906
							4940.31	0.625618
							4966.64	0.631849
