# Supplementary figures and images for: Variation of refractive indices in self-assembling honeycomb patterned PMMA films
Source: Royal Society of Chemistry journal article supplement (doi:10.1039/d5lp00191a), 2025-10-23

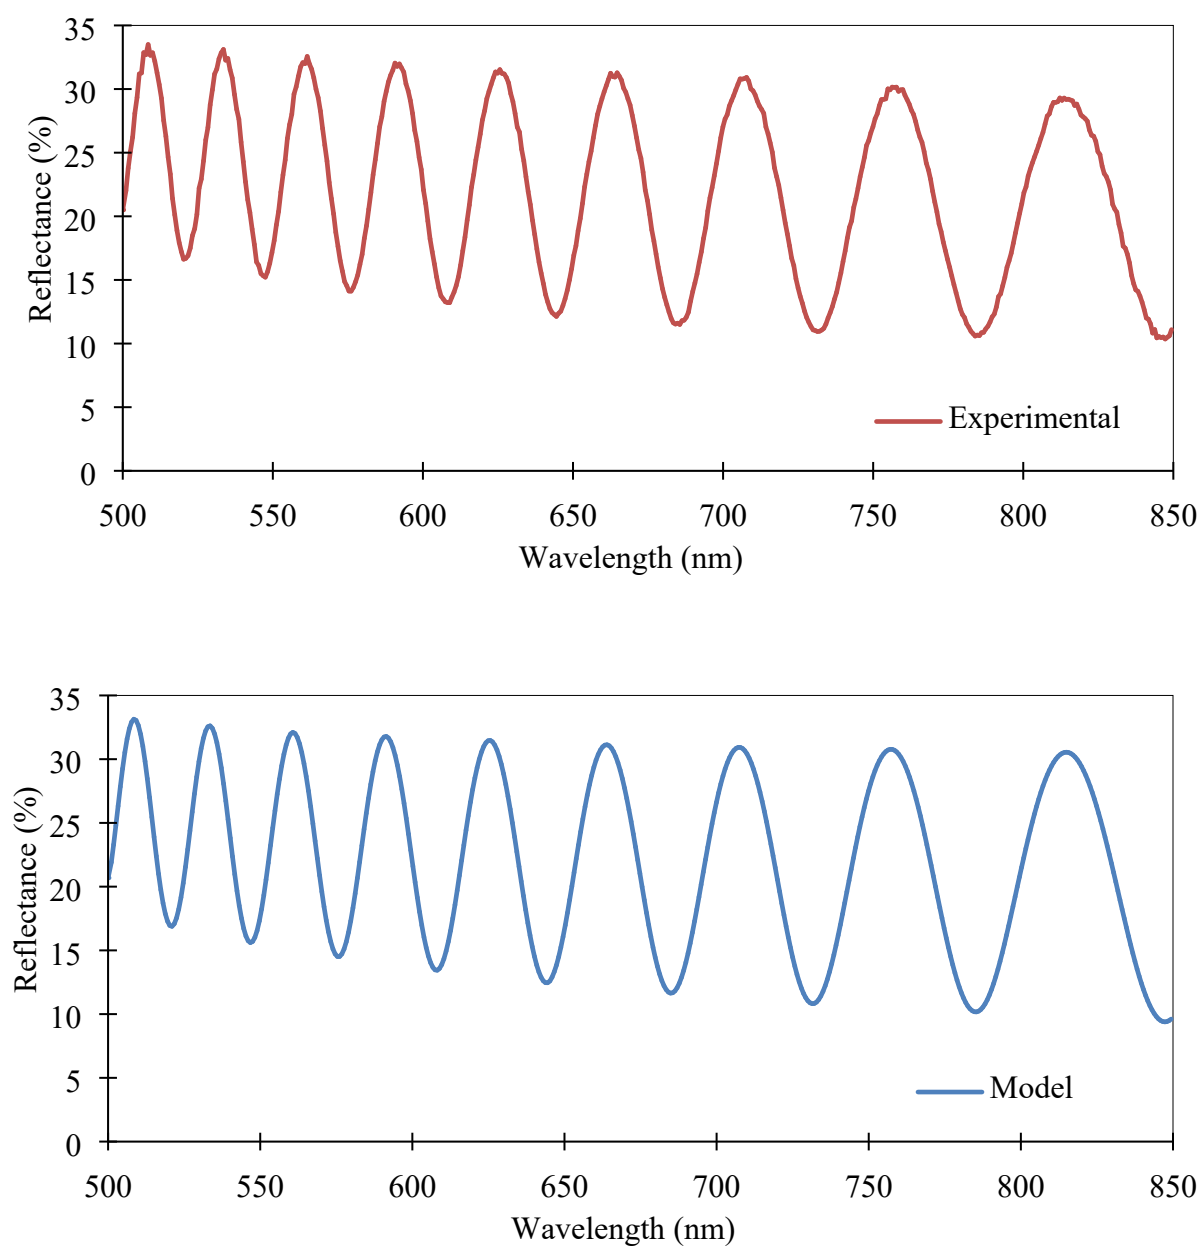

Reflectance vs Wavelength experimental and modeled curve for the 1% wt/wt PMMA at 30%RH

Supplement: d5lp00191a1.pdf [file d5lp00191a1.pdf]
